# Supplementary material for: C-type lectin domain family 4 member G(CLEC4G) is a negative marker for CD34 in the evolution of liver pathogenesis
Source: Research Square preprint supplement (doi:10.21203/rs.3.rs-1761623/v1), 2022-06-22
Supplement: Supplementary file 1 [file 220686c91d537f5d589b02f1.xlsx]

## Sheet: Sheet1
healthy controls	liver fibrosis patients	HCC patients
453.59	340.09	254.06
566.27	387.31	394.79
419.8	400.36	285.62
415.6	403.91	310.05
467.26	316.36	426.3
542.77	328.63	345.93
528.39	436.4	321.27
410.92	343.71	290.06
559.6	351.89	374.92
505.48	296.37	375.27
455.46	324.77	270.89
441.66	354.35	342.42
512.61	441.2	247.75
458.49	451.2	420.6
561.82	453.2	260.25
460.72	323.14	320.92
412.91	436.52	336.93
412.67	301.56	320.92
539.26	341.49	278.37
483.04	432.43	252.89
525.82	369	380.65
436.05	354.6	294.15
548.73	301.28	394.44
498.59	399.3	374.69
417.93	379.83	359.84
510.51	424.25	314.72
491.92	423.6	320.8
449.96	415.9	344.53
459.55	438.2	368.14
434.88	422.9	281.18
		402.51
		367.79
		422.6
		421.5
		431.2
		428.5
		311.5
		268.6
		418.9
		365.2
